# Supplementary material
Source: publisher site journal article supplement (https://www.dovepress.com/article/182428)
Supplement: Supplementary file 1 [file get_supplementary_file.php]

Supporting information

**Lipid Surface Modifications Increases Mesoporous Silica Nanoparticles Labeling Properties in Mesenchymal Stem Cells**

Roger Rosenbrand<sup>1</sup>, David Barata<sup>1</sup>, Pichaporn Sutthavas<sup>1</sup>, Ronny Mohren<sup>2</sup>, Berta Cillero-Pastor<sup>2</sup>, Pamela Habibovic<sup>1</sup> and Sabine van Rijt<sup>1\*</sup>

<sup>1</sup> Department of Instructive Biomaterials Engineering, MERLN Institute for Technology-Inspired Regenerative Medicine, Maastricht University, P.O. Box 616, 6200 MD, Maastricht, The Netherlands

<sup>2</sup> The Maastricht Multimodal Molecular Imaging Institute (M4I), Division of Imaging Mass Spectrometry, Maastricht University, Universiteitssingel 50, 6229 ER Maastricht, The Netherlands.

**Table S1.** Significantly up and down-regulated proteins found in MSN labelled hMSCs compared to control cells (protein discoverer, cut-off is >1,5 fold and < 0,5).

| Accession number | Protein name                                                         | fold-change | p-value |
|------------------|----------------------------------------------------------------------|-------------|---------|
| Q9Y618-1         | Nuclear receptor corepressor 2                                       | 3,437       | 5,1E-07 |
| Q14192-2         | Isoform 2 of Four and a half LIM domains protein 2                   | 2,644       | 2,3E-08 |
| P02656           | Apolipoprotein C-III                                                 | 2,17        | 8,8E-07 |
| P51397           | Death-associated protein 1                                           | 2,119       | 5,1E-07 |
| O75489           | NADH dehydrogenase [ubiquinone] iron-sulfur protein 3, mitochondrial | 2,037       | 6,6E-03 |
| P01344           | Insulin-like growth factor II                                        | 2,016       | 5,7E-06 |
| Q96Q89-1         | Kinesin-like protein KIF20B                                          | 1,822       | 8,0E-07 |
| O14983           | Sarcoplasmic/endoplasmic reticulum calcium ATPase 1                  | 1,793       | 7,4E-05 |
| Q5BKZ1           | DBIRD complex subunit ZNF326                                         | 1,741       | 1,1E-01 |
| O75531           | Barrier-to-autointegration factor                                    | 1,732       | 7,0E-04 |
| P02458-2         | Collagen alpha-1(II) chain                                           | 1,707       | 8,9E-02 |
| Q76M96-2         | Isoform 2 of Coiled-coil domain-containing protein 80                | 1,686       | 9,1E-02 |
| Q76M96-1         | Coiled-coil domain-containing protein 80                             | 1,686       | 9,1E-02 |
| Q7RTV0           | PHD finger-like domain-containing protein 5A                         | 1,669       | 5,4E-02 |
| Q6P1N9-1         | Putative deoxyribonuclease TATDN1                                    | 1,609       | 1,8E-01 |
| Q96N16-5         | Isoform 5 of Janus kinase and microtubule-interacting protein 1      | 1,584       | 1,3E-01 |
| Q96N16-2         | Isoform 2 of Janus kinase and microtubule-interacting protein 1      | 1,584       | 1,3E-01 |
| P62942           | Peptidyl-prolyl cis-trans isomerase FKBP1A                           | 1,508       | 1,8E-03 |
| Q13564-1         | NEDD8-activating enzyme E1 regulatory subunit                        | 0,499       | 7,2E-03 |
| P42677           | 40S ribosomal protein S27                                            | 0,495       | 7,8E-13 |
| P29558-1         | RNA-binding motif, single-stranded-interacting protein 1             | 0,494       | 4,1E-07 |
| O60256-1         | Phosphoribosyl pyrophosphate synthase-associated protein 2           | 0,493       | 7,1E-03 |
| Q14558           | Phosphoribosyl pyrophosphate synthase-associated protein 1           | 0,493       | 7,1E-03 |
| P62244           | 40S ribosomal protein S15a                                           | 0,49        | 3,5E-09 |
| Q9NRY4           | Rho GTPase-activating protein 35                                     | 0,489       | 1,8E-02 |
| P63173           | 60s ribosomal protein l38                                            | 0,477       | 2,7E-14 |
| P30405-2         | Isoform 2 of Peptidyl-prolyl cis-trans isomerase F, mitochondrial    | 0,473       | 5,9E-04 |
| P30405           | Peptidyl-prolyl cis-trans isomerase F, mitochondrial                 | 0,473       | 5,9E-04 |
| Q6BAA4           | Fc receptor-like B                                                   | 0,473       | 5,9E-04 |
| Q6NVY1           | 3-hydroxyisobutyryl-CoA hydrolase, mitochondrial                     | 0,464       | 8,1E-03 |
| Q58FG1           | Putative heat shock protein HSP 90-alpha A4                          | 0,453       | 7,5E-03 |
| P07996           | thrombospondin-1                                                     | 0,451       | 4,1E-16 |
| P61011-1         | signal recognition particle 54 kDa protein                           | 0,427       | 3,4E-04 |
| Q9NP77           | RNA polymerase II subunit A C-terminal domain phosphatase SSU72      | 0,418       | 1,4E-03 |
| P62701           | 40S ribosomal protein S4, X isoform                                  | 0,418       | 4,1E-16 |
| Q8TD47           | 40S ribosomal protein S4, Y isoform 2                                | 0,411       | 4,1E-16 |
| P17096-2         | Isoform HMG-Y of High mobility group protein HMG-I/HMG-Y             | 0,41        | 1,3E-05 |
| P22090           | 40S ribosomal protein S4, Y isoform 1                                | 0,386       | 4,1E-16 |
| P62269           | 40S ribosomal protein S18                                            | 0,358       | 4,1E-16 |
| P62280           | 40S ribosomal protein S11                                            | 0,337       | 4,1E-16 |
| P62277           | 40S ribosomal protein S13                                            | 0,322       | 4,1E-16 |
| P39019           | 40S ribosomal protein S19                                            | 0,312       | 4,1E-16 |
| P62249           | 40S ribosomal protein S16                                            | 0,258       | 4,1E-16 |

Q99962 Endophilin-A1 0,25 5,3E-11

**Table S2.** Significantly up and down-regulated proteins found in MSN-LIP labelled hMSCs compared to control cells (protein discoverer, cut-off is >1,5 fold and < 0,5).

| Accession number | protein name                                                          | fold change | p-value  |
|------------------|-----------------------------------------------------------------------|-------------|----------|
| Q9Y618-1         | Nuclear receptor corepressor 2                                        | 5,114       | 3,5E-16  |
| Q14192-2         | Isoform 2 of Four and a half LIM domains protein 2                    | 3,678       | 2,01E-11 |
| Q06828           | Fibromodulin                                                          | 2,586       | 3,76E-06 |
| Q13308-5         | Isoform 5 of Inactive tyrosine-protein kinase 7                       | 2,383       | 3,87E-05 |
| Q15369-2         | Isoform 2 of Transcription elongation factor B polypeptide 1          | 2,197       | 0,000297 |
| P22626-2         | Isoform A2 of Heterogeneous nuclear ribonucleoproteins A2/B1          | 2,132       | 0,000605 |
| Q16629           | serine/arginine-rich splicing factor 7                                | 2,11        | 0,00074  |
| Q99962           | Endophilin-A1                                                         | 2,047       | 0,001452 |
| Q13595-1         | Transformer-2 protein homolog alpha                                   | 2,038       | 0,001581 |
| Q96Q89-1         | Kinesin-like protein KIF20B                                           | 2,017       | 0,00195  |
| P51397           | Death-associated protein 1                                            | 1,991       | 0,00256  |
| Q9NPQ8-3         | Isoform 3 of Synembryn-A                                              | 1,921       | 0,004918 |
| O14983           | Sarcoplasmic/endoplasmic reticulum calcium ATPase 1                   | 1,907       | 0,005548 |
| P09012           | U1 SMALL NUCLEAR RIBONUCLEOPROTEIN A                                  | 1,9         | 0,005804 |
| Q9UNH7-2         | Isoform 2 of Sorting nexin-6                                          | 1,84        | 0,010167 |
| Q96N16-5         | Isoform 5 of Janus kinase and microtubule-interacting protein 1       | 1,825       | 0,011733 |
| Q96N16-2         | Isoform 2 of Janus kinase and microtubule-interacting protein 1       | 1,825       | 0,011733 |
| P29354-1         | Growth factor receptor-bound protein 2                                | 1,781       | 0,017536 |
| P62993-2         | Isoform 2 of Growth factor receptor-bound protein 2                   | 1,781       | 0,017536 |
| Q8WUD1           | Ras-related protein Rab-2B                                            | 1,738       | 0,026806 |
| Q9HAU6           | Putative translationally-controlled tumor protein-like protein TPT1P8 | 1,678       | 0,046673 |
| P14735           | insulin-degrading enzyme                                              | 0,499       | 0,001034 |
| Q14651           | Plastin-1                                                             | 0,494       | 0,000817 |
| P25445-1         | Tumor necrosis factor receptor superfamily member 6                   | 0,492       | 0,000741 |
| Q9H694-1         | Protein bicaudal C homolog 1                                          | 0,492       | 0,000747 |
| Q13564-1         | NEDD8-activating enzyme E1 regulatory subunit                         | 0,491       | 0,000737 |
| P53611           | Geranylgeranyl transferase type-2 subunit beta                        | 0,491       | 0,00074  |
| Q8WXF1           | Paraspeckle component 1                                               | 0,489       | 0,000678 |
| Q14568           | Heat shock protein HSP 90-alpha A2                                    | 0,489       | 0,00067  |
| Q9UMX5           | Neudesin                                                              | 0,488       | 0,000649 |
| P04181-2         | Isoform 2 of Ornithine aminotransferase, mitochondrial                | 0,487       | 0,000628 |
| Q9H254           | Spectrin beta chain, non-erythrocytic 4                               | 0,482       | 0,000495 |
| P18085           | ADP-ribosylation factor 4                                             | 0,473       | 0,000302 |
| Q15287-1         | RNA-binding protein with serine-rich domain 1                         | 0,472       | 0,000297 |
| Q96IU4-2         | Isoform 2 of Protein ABHD14B                                          | 0,467       | 0,000229 |
| P09960-2         | Isoform 2 of Leukotriene A-4 hydrolase                                | 0,467       | 0,000229 |
| P09960-3         | Isoform 3 of Leukotriene A-4 hydrolase                                | 0,467       | 0,000229 |
| P07951-1         | Tropomyosin beta chain                                                | 0,455       | 0,000115 |

|          |                                                                   |       |          |
|----------|-------------------------------------------------------------------|-------|----------|
| P06703   | protein S100-A6                                                   | 0,453 | 0,000105 |
| P80723-2 | Isoform 2 of Brain acid soluble protein 1                         | 0,453 | 0,000105 |
| Q5JTH9-1 | RRP12-like protein                                                | 0,452 | 0,000104 |
| P63167   | Dynein light chain 1, cytoplasmic                                 | 0,451 | 9,52E-05 |
| P62328   | Thymosin beta-4                                                   | 0,45  | 9,25E-05 |
| Q8N556-2 | Isoform 2 of Actin filament-associated protein 1                  | 0,449 | 8,77E-05 |
| Q8N556-1 | actin filament-associated protein 1                               | 0,449 | 8,77E-05 |
| P54132   | Bloom syndrome protein                                            | 0,448 | 8,2E-05  |
| O94919   | endonuclease domain-containing 1 protein                          | 0,447 | 7,89E-05 |
| P67809   | Nuclease-sensitive element-binding protein 1                      | 0,438 | 4,47E-05 |
| Q9Y224   | UPF0568 protein C14orf166                                         | 0,432 | 3,14E-05 |
| Q5JXB2   | Putative ubiquitin-conjugating enzyme E2 N-like                   | 0,429 | 2,57E-05 |
| O43852-9 | Isoform 9 of Calumenin                                            | 0,423 | 1,76E-05 |
| Q5T1M5   | FK506-binding protein 15                                          | 0,403 | 4,3E-06  |
| Q9P299   | coatamer subunit zeta-2                                           | 0,399 | 3,14E-06 |
| O95399   | Urotensin-2                                                       | 0,397 | 2,9E-06  |
| P06454-1 | Prothymosin alpha                                                 | 0,391 | 1,7E-06  |
| P06454-2 | Isoform 2 of Prothymosin alpha                                    | 0,391 | 1,7E-06  |
| P16989-3 | Isoform 3 of Y-box-binding protein 3                              | 0,388 | 1,45E-06 |
| P63172   | Dynein light chain Tctex-type 1                                   | 0,378 | 6,41E-07 |
| Q9NS69   | Mitochondrial import receptor subunit TOM22 homolog               | 0,377 | 5,59E-07 |
| O43237   | Cytoplasmic dynein 1 light intermediate chain 2                   | 0,376 | 5,12E-07 |
| P29536-1 | Leiomodin-1                                                       | 0,374 | 4,47E-07 |
| O60762   | Dolichol-phosphate mannosyltransferase subunit 1                  | 0,373 | 3,97E-07 |
| P51858-3 | Isoform 3 of Hepatoma-derived growth factor                       | 0,369 | 2,94E-07 |
| Q5JSH3   | WD repeat-containing protein 44                                   | 0,369 | 2,9E-07  |
| Q58FF8   | Putative heat shock protein HSP 90-beta 2                         | 0,357 | 9,81E-08 |
| Q969X5   | Endoplasmic reticulum-Golgi intermediate compartment protein 1    | 0,355 | 8,54E-08 |
| P51970   | NADH dehydrogenase [ubiquinone] 1 alpha subcomplex subunit 8      | 0,333 | 9,48E-09 |
| O00193   | Small acidic protein                                              | 0,331 | 8,44E-09 |
| Q9Y608   | Leucine-rich repeat flightless-interacting protein 2              | 0,329 | 6,69E-09 |
| Q13217   | DnaJ homolog subfamily C member 3                                 | 0,322 | 3,07E-09 |
| P29966   | Myristoylated alanine-rich C-kinase substrate                     | 0,312 | 9,5E-10  |
| Q32MZ4-4 | Isoform 4 of Leucine-rich repeat flightless-interacting protein 1 | 0,311 | 8,5E-10  |
| O00232-1 | 26s proteasome non-atpase regulatory subunit 12                   | 0,299 | 1,97E-10 |
| P30405-2 | Isoform 2 of Peptidyl-prolyl cis-trans isomerase F, mitochondrial | 0,296 | 1,39E-10 |
| P30405   | Peptidyl-prolyl cis-trans isomerase F, mitochondrial              | 0,296 | 1,39E-10 |
| Q6BAA4   | Fc receptor-like B                                                | 0,296 | 1,39E-10 |
| O75410-8 | Isoform 8 of Transforming acidic coiled-coil-containing protein 1 | 0,292 | 7,39E-11 |
| O75607   | Nucleoplasmin-3                                                   | 0,286 | 3,63E-11 |
| O95319-1 | CUGBP Elav-like family member 2                                   | 0,269 | 2,99E-12 |
| O95319-5 | Isoform 5 of CUGBP Elav-like family member 2                      | 0,269 | 2,99E-12 |
| O14602   | Eukaryotic translation initiation factor 1A, Y-chromosomal        | 0,264 | 1,43E-12 |
| Q58FG0   | Putative heat shock protein HSP 90-alpha A5                       | 0,253 | 2,05E-13 |
| P60903   | Protein S100-A10                                                  | 0,23  | 3,5E-16  |

P84101-3 Isoform 3 of Small EDRK-rich factor 2 0,226 3,5E-16

**Table S3.** Significantly up and down-regulated proteins found in MSN-PEG2000 labelled hMSCs compared to control cells (protein discoverer, cut-off is >1,5 fold and < 0,5).

| Accession number | protein name                                                          | fold change | p-value  |
|------------------|-----------------------------------------------------------------------|-------------|----------|
| Q13308-5         | Isoform 5 of Inactive tyrosine-protein kinase 7                       | 2,467       | 7,51E-08 |
| Q96Q89-1         | Kinesin-like protein KIF20B                                           | 1,904       | 2,63E-09 |
| Q9Y618-1         | Nuclear receptor corepressor 2                                        | 1,888       | 0,014032 |
| Q16629           | serine/arginine-rich splicing factor 7                                | 1,865       | 6E-06    |
| Q15369-2         | Isoform 2 of Transcription elongation factor B polypeptide 1          | 1,819       | 2,08E-09 |
| Q96N16-5         | Isoform 5 of Janus kinase and microtubule-interacting protein 1       | 1,728       | 0,004393 |
| Q96N16-2         | Isoform 2 of Janus kinase and microtubule-interacting protein 1       | 1,728       | 0,004393 |
| P51397           | Death-associated protein 1                                            | 1,696       | 0,000561 |
| Q9HAU6           | Putative translationally-controlled tumor protein-like protein TPT1P8 | 1,69        | 3,03E-05 |
| P61077-1         | Ubiquitin-conjugating enzyme E2 D3                                    | 1,673       | 3,11E-05 |
| Q86UE4           | protein LYRIC                                                         | 1,579       | 0,040764 |
| P28065           | Proteasome subunit beta type-9                                        | 1,554       | 0,010654 |
| P54727-2         | Isoform 2 of UV excision repair protein RAD23 homolog B               | 1,532       | 0,000985 |
| P29354-1         | Growth factor receptor-bound protein 2                                | 1,513       | 0,008493 |
| P62993-2         | Isoform 2 of Growth factor receptor-bound protein 2                   | 1,513       | 0,008493 |
| Q58FF6           | Putative heat shock protein HSP 90-beta 4                             | 1,511       | 0,000188 |
| Q969E4           | transcription elongation factor A protein-like 3                      | 0,464       | 2,5E-10  |
| Q9Y608           | Leucine-rich repeat flightless-interacting protein 2                  | 0,463       | 3,5E-05  |
| Q9H254           | Spectrin beta chain, non-erythrocytic 4                               | 0,46        | 3,22E-16 |
| O75607           | Nucleoplasmin-3                                                       | 0,447       | 2,11E-05 |
| P06454-1         | Prothymosin alpha                                                     | 0,444       | 3,22E-16 |
| P06454-2         | Isoform 2 of Prothymosin alpha                                        | 0,444       | 3,22E-16 |
| P60903           | Protein S100-A10                                                      | 0,438       | 3,22E-16 |
| P10915           | Hyaluronan and proteoglycan link protein 1                            | 0,414       | 3,22E-16 |
| Q13242           | serine/arginine-rich splicing factor 9                                | 0,393       | 5,13E-12 |
| Q32MZ4-4         | Isoform 4 of Leucine-rich repeat flightless-interacting protein 1     | 0,369       | 1,06E-09 |
| Q96G03           | Phosphoglucomutase-2                                                  | 0,287       | 3,22E-16 |

**Table S4.** Significantly up and down-regulated proteins found in MSN-PEG750 labelled hMSCs compared to control cells (protein discoverer, cut-off is >1,5 fold and < 0,5).

| Accession number | protein name                                                         | fold change | p-value |
|------------------|----------------------------------------------------------------------|-------------|---------|
| Q5JSH3           | WD repeat-containing protein 44                                      | 3,205       | 2,7E-07 |
| Q9Y618-1         | Nuclear receptor corepressor 2                                       | 2,455       | 3,0E-04 |
| O75489           | NADH dehydrogenase [ubiquinone] iron-sulfur protein 3, mitochondrial | 2,317       | 3,4E-04 |
| O14602           | Eukaryotic translation initiation factor 1A, Y-chromosomal           | 2,228       | 4,5E-05 |
| Q96Q89-1         | Kinesin-like protein KIF20B                                          | 1,99        | 8,0E-09 |
| O95319-1         | CUGBP Elav-like family member 2                                      | 1,916       | 1,1E-03 |
| O95319-5         | Isoform 5 of CUGBP Elav-like family member 2                         | 1,916       | 1,1E-03 |

|          |                                                                   |       |         |
|----------|-------------------------------------------------------------------|-------|---------|
| P06454-1 | Prothymosin alpha                                                 | 1,889 | 1,2E-09 |
| P06454-2 | Isoform 2 of Prothymosin alpha                                    | 1,889 | 1,2E-09 |
| P62328   | Thymosin beta-4                                                   | 1,844 | 5,8E-09 |
| P63172   | Dynein light chain Tctex-type 1                                   | 1,769 | 6,5E-03 |
| Q9Y608   | Leucine-rich repeat flightless-interacting protein 2              | 1,717 | 1,4E-02 |
| P51970   | NADH dehydrogenase [ubiquinone] 1 alpha subcomplex subunit 8      | 1,701 | 1,1E-02 |
| Q15287-1 | RNA-binding protein with serine-rich domain 1                     | 1,698 | 9,4E-03 |
| P16989-3 | Isoform 3 of Y-box-binding protein 3                              | 1,673 | 1,3E-02 |
| P60903   | Protein S100-A10                                                  | 1,633 | 6,6E-06 |
| O75531   | Barrier-to-autointegration factor                                 | 1,631 | 7,5E-03 |
| P25445-1 | Tumor necrosis factor receptor superfamily member 6               | 1,628 | 1,1E-01 |
| Q9H254   | Spectrin beta chain, non-erythrocytic 4                           | 1,61  | 1,9E-05 |
| P80723-2 | Isoform 2 of Brain acid soluble protein 1                         | 1,56  | 6,4E-05 |
| P05114   | Non-histone chromosomal protein HMG-14                            | 1,56  | 4,4E-03 |
| Q9UMX5   | Neudesin                                                          | 1,541 | 6,1E-03 |
| O43852-9 | Isoform 9 of Calumenin                                            | 1,507 | 3,0E-04 |
| P62942   | Peptidyl-prolyl cis-trans isomerase FKBP1A                        | 0,476 | 7,0E-09 |
| P02656   | Apolipoprotein C-III                                              | 0,476 | 4,8E-04 |
| Q5VT25-1 | Serine/threonine-protein kinase MRCK alpha                        | 0,452 | 2,6E-03 |
| Q09666-2 | Isoform 2 of Neuroblast differentiation-associated protein AHNAK  | 0,444 | 1,7E-05 |
| Q58FG1   | Putative heat shock protein HSP 90-alpha A4                       | 0,443 | 4,4E-03 |
| P22692-2 | Isoform 2 of Insulin-like growth factor-binding protein 4         | 0,439 | 2,9E-04 |
| P22692   | insulin-like growth factor-binding protein 4                      | 0,439 | 2,9E-04 |
| Q7L2H7   | Eukaryotic translation initiation factor 3 subunit M              | 0,436 | 8,4E-05 |
| Q7L2H7-2 | Isoform 2 of Eukaryotic translation initiation factor 3 subunit M | 0,425 | 1,5E-04 |
| P07996   | thrombospondin-1                                                  | 0,416 | 3,3E-16 |
| P68402-1 | platelet-activating factor acetylhydrolase IB subunit beta        | 0,413 | 1,9E-07 |
| Q9NRY4   | Rho GTPase-activating protein 35                                  | 0,402 | 8,1E-04 |
| Q9BRK5-2 | Isoform 2 of 45 kDa calcium-binding protein                       | 0,367 | 7,8E-05 |
| P84101-3 | Isoform 3 of Small EDRK-rich factor 2                             | 0,302 | 5,2E-12 |
| Q9Y6K9   | NF-kappa-B essential modulator                                    | 0,254 | 4,7E-09 |

**Table S5.** Identified enriched molecular functions in MSN exposed hMSCs (STRING).

|                   | #pathway ID | pathway description                       | observed count | gene false discovery rate |
|-------------------|-------------|-------------------------------------------|----------------|---------------------------|
| <b>MSN</b>        | GO.0003735  | structural constituent of ribosome        | 8              | 4.32e-09                  |
|                   | GO.0019843  | rRNA binding                              | 5              | 1.25e-06                  |
|                   | GO.0003723  | RNA binding                               | 10             | 0.00282                   |
|                   | GO.0004749  | ribose phosphate diphosphokinase activity | 2              | 0.0108                    |
| <b>MSN-LIP</b>    | GO.0005198  | structural molecule activity              | 11             | 0.00337                   |
|                   | GO.0005200  | structural constituent of cytoskeleton    | 5              | 0.0251                    |
| <b>MSN-PEG750</b> | GO.0005198  | structural molecule activity              | 7              | 0.000977                  |

**Table S6.** Identified enriched cellular component in MSN exposed hMSCs (STRING).

|                | <b>pathway ID</b> | <b>pathway description</b>                      | <b>observed count</b> | <b>gene</b> | <b>false discovery rate</b> |
|----------------|-------------------|-------------------------------------------------|-----------------------|-------------|-----------------------------|
| <b>MSN</b>     | GO.0022627        | cytosolic small ribosomal subunit               | 8                     |             | 2.82e-14                    |
|                | GO.0022626        | cytosolic ribosome                              | 9                     |             | 3.36e-13                    |
|                | GO.0015935        | small ribosomal subunit                         | 7                     |             | 1.38e-10                    |
|                | GO.0005840        | ribosome                                        | 9                     |             | 2.34e-10                    |
|                | GO.0044391        | ribosomal subunit                               | 8                     |             | 3.47e-10                    |
|                | GO.0030529        | ribonucleoprotein complex                       | 9                     |             | 3.7e-06                     |
|                | GO.0005829        | cytosol                                         | 14                    |             | 0.000191                    |
|                | GO.0002189        | ribose phosphate diphosphokinase complex        | 2                     |             | 0.00024                     |
|                | GO.0005925        | focal adhesion                                  | 5                     |             | 0.00751                     |
|                | GO.0032991        | macromolecular complex                          | 13                    |             | 0.0297                      |
| <b>MSN-LIP</b> | GO.0005856        | cytoskeleton                                    | 20                    |             | 8.41e-05                    |
|                | GO.0031988        | membrane-bounded vesicle                        | 27                    |             | 8.41e-05                    |
|                | GO.0044421        | extracellular region part                       | 28                    |             | 8.41e-05                    |
|                | GO.0044430        | cytoskeletal part                               | 17                    |             | 8.41e-05                    |
|                | GO.0070062        | extracellular exosome                           | 24                    |             | 8.41e-05                    |
|                | GO.0045111        | intermediate filament cytoskeleton              | 8                     |             | 9.9e-05                     |
|                | GO.0005576        | extracellular region                            | 30                    |             | 0.000123                    |
|                | GO.0005737        | cytoplasm<br>intracellular non-membrane-bounded | 46                    |             | 0.000596                    |
|                | GO.0043232        | organelle                                       | 25                    |             | 0.000663                    |
|                | GO.0044446        | intracellular organelle part                    | 38                    |             | 0.00183                     |
|                | GO.0005882        | intermediate filament                           | 6                     |             | 0.00222                     |
|                | GO.0005868        | cytoplasmic dynein complex                      | 3                     |             | 0.00873                     |
|                | GO.0015629        | actin cytoskeleton                              | 7                     |             | 0.015                       |
|                | GO.0043234        | protein complex                                 | 23                    |             | 0.0224                      |
|                | GO.0043229        | intracellular organelle                         | 45                    |             | 0.0256                      |
|                | GO.0044444        | cytoplasmic part                                | 34                    |             | 0.0275                      |
|                | GO.0005829        | cytosol                                         | 20                    |             | 0.0299                      |
|                | <b>MSN-PEG750</b> | GO.0070062                                      | extracellular exosome | 13          |                             |
| GO.0044421     |                   | extracellular region part                       | 14                    |             | 7.87e-06                    |
| GO.0005576     |                   | extracellular region                            | 14                    |             | 4.67e-05                    |
| GO.0045111     |                   | intermediate filament cytoskeleton              | 5                     |             | 0.000264                    |
| GO.0005856     |                   | cytoskeleton                                    | 9                     |             | 0.00101                     |
| GO.0005882     |                   | intermediate filament                           | 4                     |             | 0.00236                     |
| GO.0043232     |                   | intracellular non-membrane-bounded<br>organelle | 11                    |             | 0.00236                     |

**Table S7.** Identical upregulated proteins identified in MSN labeled hMSCs

| <b>sample</b>                                         | <b>total</b> | <b>swissprot ID number and protein name</b>                                                                                                                                                                                                                                               |
|-------------------------------------------------------|--------------|-------------------------------------------------------------------------------------------------------------------------------------------------------------------------------------------------------------------------------------------------------------------------------------------|
| MSN, MSN-LIP, MSN-LIPPEG2000, MSN-PEG2000, MSN-PEG750 | 1            | Q9Y618-1Nuclear receptor corepressor 2                                                                                                                                                                                                                                                    |
| MSN, MSN-LIP, MSN-LIPPEG2000, MSN-PEG2000             | 2            | Q96N16-2Isoform 2 of Janus kinase and microtubule-interacting protein 1<br>Q96N16-5Isoform 5 of Janus kinase and microtubule-interacting protein 1                                                                                                                                        |
| MSN, MSN-LIP, MSN-PEG2000, MSN-PEG750                 | 1            | Q96Q89-1Kinesin-like protein KIF20B                                                                                                                                                                                                                                                       |
| MSN, MSN-LIP, MSN-LIPPEG2000                          | 2            | Q14192-2Isoform 2 of Four and a half LIM domains protein 2<br>O14983Sarcoplasmic/endoplasmic reticulum calcium ATPase 1                                                                                                                                                                   |
| MSN, MSN-LIP, MSN-PEG2000                             | 1            | P51397Death-associated protein 1                                                                                                                                                                                                                                                          |
| MSN, MSN-LIPPEG2000, MSN-PEG750                       | 2            | O75489NADH dehydrogenase [ubiquinone] iron-sulfur protein 3<br>O75531Barrier-to-autointegration factor                                                                                                                                                                                    |
| MSN-LIP, MSN-LIPPEG2000, MSN-PEG2000                  | 1            | Q13308-5Isoform 5 of Inactive tyrosine-protein kinase 7                                                                                                                                                                                                                                   |
| MSN, MSN-LIPPEG2000                                   | 2            | P02656Apolipoprotein C-III<br>Q6P1N9-1Putative deoxyribonuclease TATDN1                                                                                                                                                                                                                   |
| MSN-LIP, MSN-LIPPEG2000                               | 1            | Q99962Endophilin-A1                                                                                                                                                                                                                                                                       |
| MSN-LIP, MSN-PEG2000                                  | 7            | P62993-2Isoform 2 of Growth factor receptor-bound protein 2<br>Q9HAU6Putative translationally-controlled tumor protein-like protein TPT1P8<br>Q15369-2Isoform 2 of Transcription elongation factor B polypeptide 1<br>Q86UE4protein LYRIC<br>Q16629serine/arginine-rich splicing factor 7 |
| MSN-LIPPEG2000, MSN-PEG750                            | 1            | P29354-1Growth factor receptor-bound protein 2<br>P61077-1Ubiquitin-conjugating enzyme E2 D3<br>Q5JSH3WD repeat-containing protein 44                                                                                                                                                     |



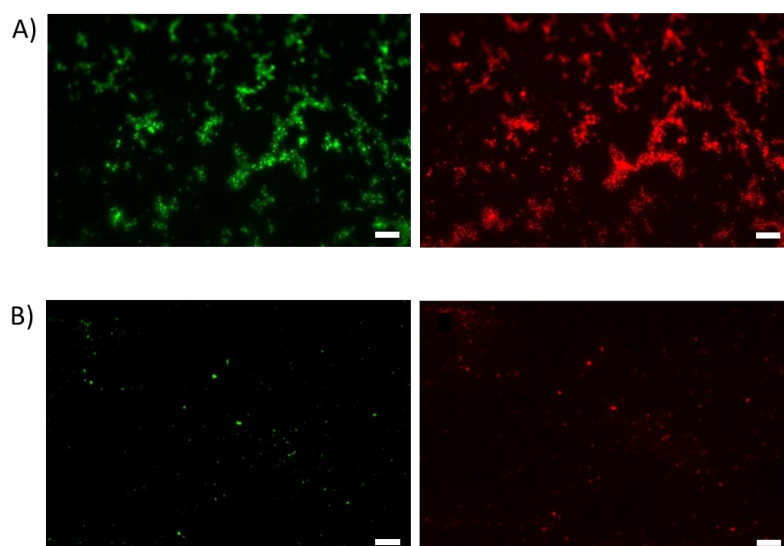

**Figure S1.** A) MSNs are functionalized on their surface with amine groups (labelled with FITC-NHS, green), and in their core with thiol groups (labeled with ATTO633 maleimide, red). B) Lipid bilayers are covering MSNs as shown by co-labeling; MSN labeled with ATTO633 maleimide (red) to the core thiol groups and lipid bilayer labeling by incorporating fluorescently tagged phospholipid in the lipid bilayer (green). Scale bar is 50  $\mu\text{m}$ .

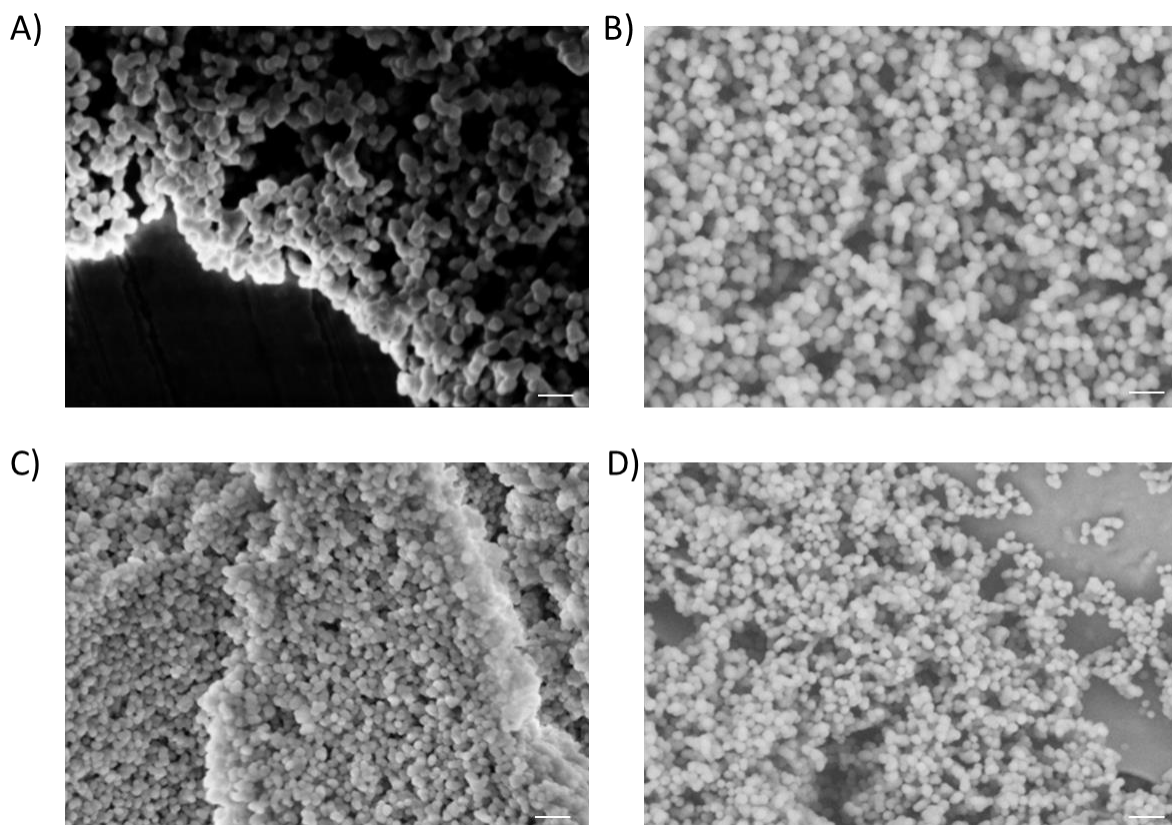

**Figure S2.** SEM images of A) MSN-LIP, B) MSN-LIP-PEG2000, C) MSN-PEG750 and D) MSN-PEG2000. Scale bar is 200 nm.

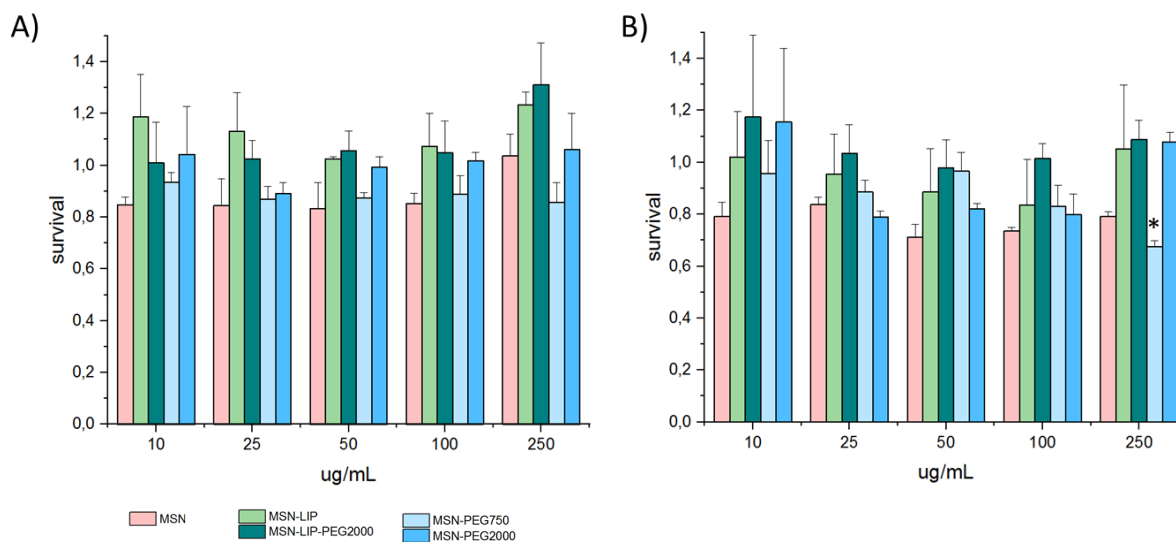

**Figure S3.** Effect of MSN labeling on hMSC cell metabolism (D313) using the MTT assay showing no dose-responsive effects on metabolic activity after; A) after 24 h of exposure and B) after 72 h of exposure. A small but significant decrease of cell survival was observed for hMSCs exposed to 250  $\mu\text{g/mL}$  MSN-PEG750 (\*  $p < 0.05$ ).

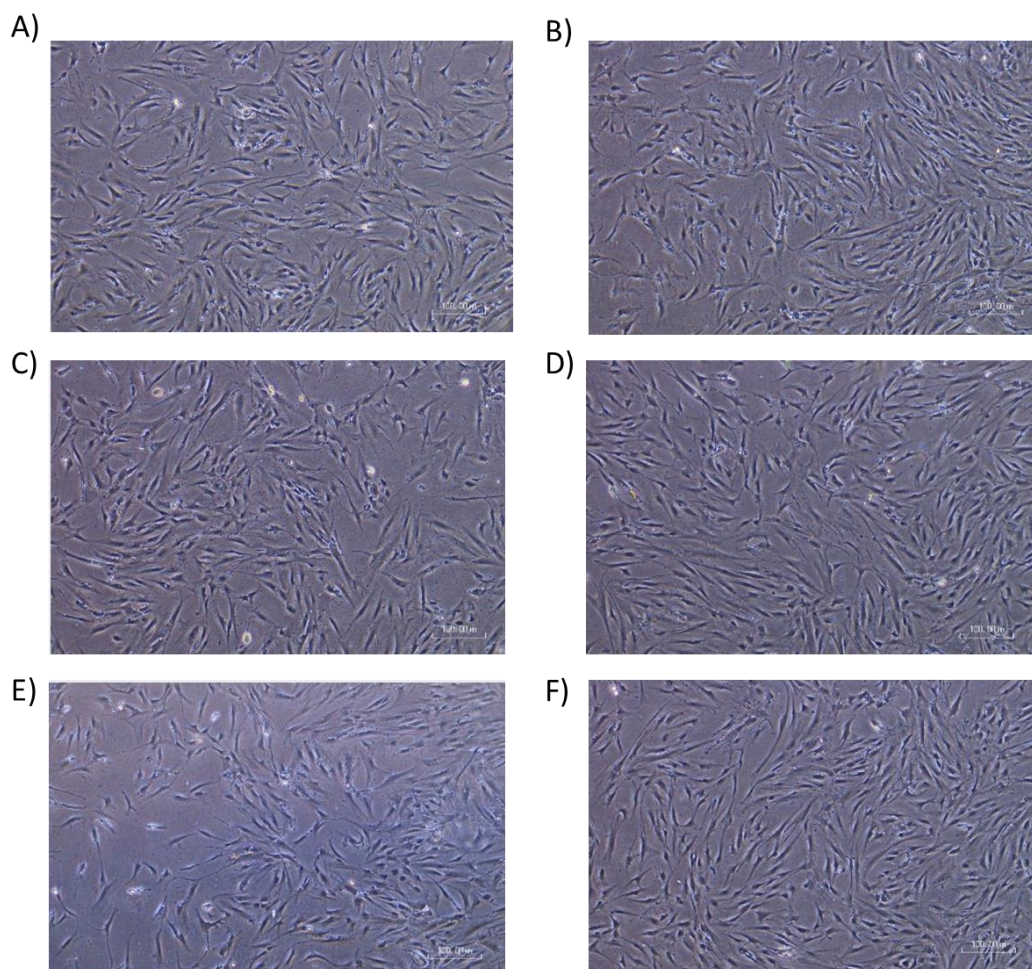

**Figure S4.** Light microscopy images taken from hMSCs exposed to MSNs (A), MSN-LIP (B), MSN-LIP-PEG2000 (C), MSN-PEG750 (D) and MSN-PEG2000 particles (E) at a concentration of 25  $\mu\text{g}/\text{mL}$  for 24 hours. Control hMSCs are shown in F. Images were taken at a 4x magnification

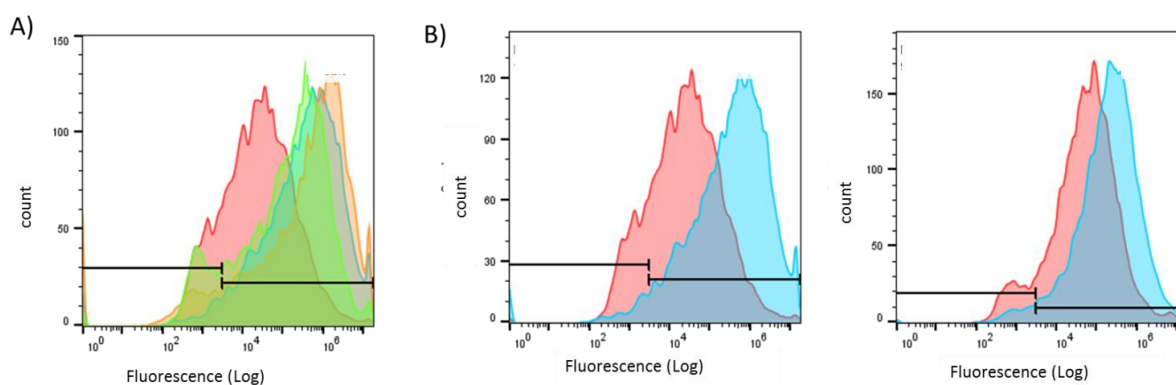

**Figure S5.** Flow cytometry histograms of A) hMSCs (D133A) exposed to MSN (red), MSN-PEG2000 (green), MSN-LIP-PEG2000 (orange) and MSN-LIP (blue) after 2h. B) hMSCs (D313) to MSN (red) and MSN-LIP (blue) after 2h (left) and 24h (right) .

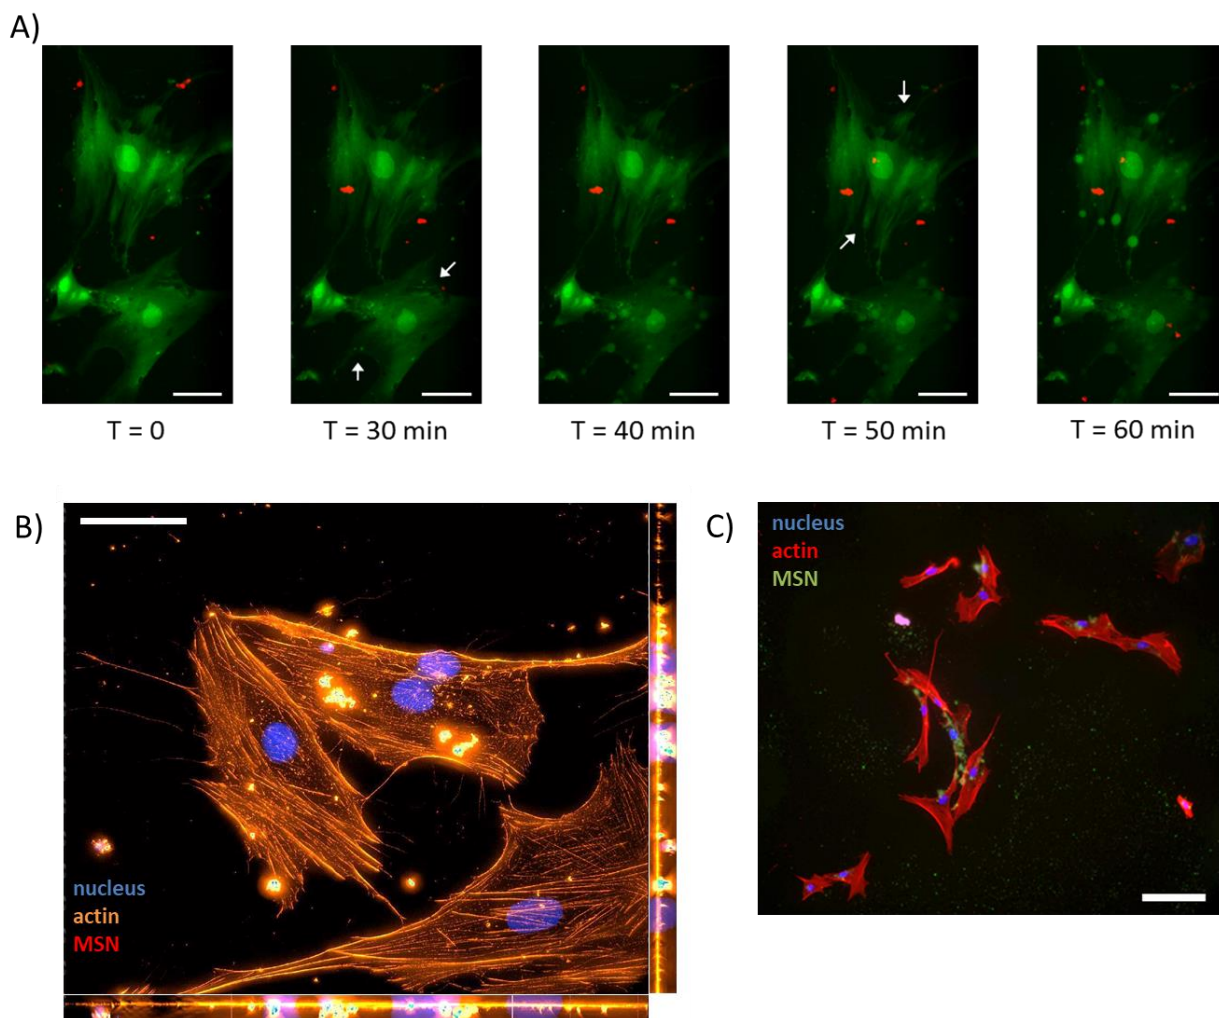

**Figure S6.** A) Live cell imaging of hMSCs stained with CellTracker (green). hMSCs were exposed to labelled MSNs (red) at a concentration of 25  $\mu\text{g}/\text{mL}$ . T = 0 is directly after MSN exposure. Images were acquired at 30, 40, 50 and 60 minutes after MSN exposure using a 60x oil objective, scale bar is 50  $\mu\text{m}$ . B) Maximum intensity projections of orthogonal views of hMSCs exposed to labeled MSNs (red), scale bar is 50  $\mu\text{m}$ . C) hMSCs exposed to MSN-LIP (green), scale bar is 100  $\mu\text{m}$ .

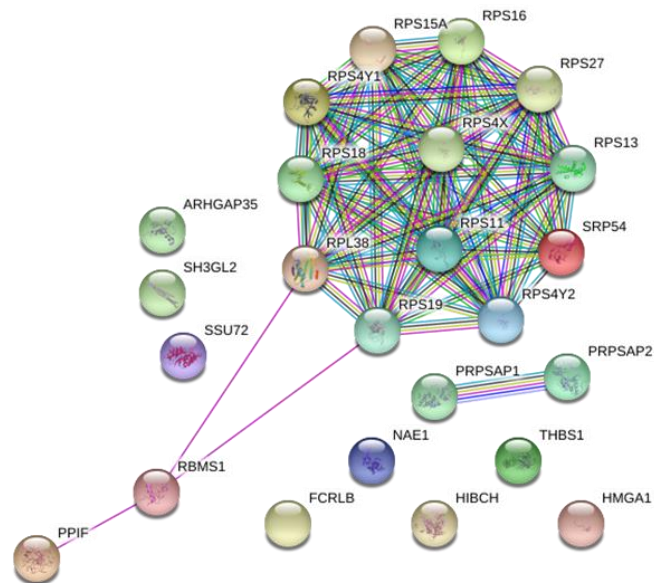

**Figure S7.** Network of proteins identified to be differentially regulated in hMSCs labeled with non-surface coated MSNs (STRING). (center proteins consist of RPS15A = Ribosomal protein S15a, RPS16 = Ribosomal protein S16, RPS4Y1 = Ribosomal protein S4, Y-linked 1, RPS4X = Ribosomal protein S4, X-linked, RPS27 = Ribosomal protein S27, RPS13 = Ribosomal protein S13, RPS11 = Ribosomal protein S11, RPS19 = Ribosomal protein S19, SRP54 = Signal recognition particle 54kDa, RPS4Y2 = Ribosomal protein S4, Y-linked 2, RPL38 = Ribosomal protein L38)
